# Supplementary material for: Purity Determines the Effect of Extracellular Vesicles Derived from Mesenchymal Stromal Cells
Source: PubMed Central journal article supplement (PMC7072280; doi:10.3390/cells9020422), 2020-02-12
Supplement: cells-09-00422-s001.pdf [file cells-09-00422-s001.pdf]

1 Article

2 **Purity determines the effect of Extracellular Vesicles**  
3 **derived from Mesenchymal Stromal Cells**  
4 **(Supplementary data)**

5 **Maria Antònia Forteza-Genestra** <sup>†,1,2</sup>, **Miquel Antich-Rosselló** <sup>†,1,2</sup>, **Javier Calvo** <sup>1,2,3</sup>, **Antoni Gayà**  
6 <sup>1,2,3</sup>, **Marta Monjo** <sup>1,2,\*</sup>, **Joana Maria Ramis** <sup>1,2,\*</sup>

7 <sup>1</sup> Cell Therapy and Tissue Engineering Group, Research Institute on Health Sciences (IUNICS), University of  
8 the Balearic Islands, Ctra Valldemossa km 7.5, 07122 Palma, Spain; maria.forteza@ssib.es (M.A.F.-G.);  
9 miquel.antich1@estudiant.uib.es (M.A.-R.); jcalvo@fbstib.org (J.C.); agaya@fbstib.org (A.G.)

10 <sup>2</sup> Health Research Institute of the Balearic Islands (IdISBa), 07120, Palma, Spain

11 <sup>3</sup> Fundació Banc de Sang i Teixits de les Illes Balears (FBSTIB), 07004, Palma, Spain

12 \* Correspondence: marta.monjo@uib.es (M.M.), joana.ramis@uib.es (J.M.R.); Tel.: +34 971 25 99 60 (M.M.), +34  
13 971 25 96 07 (J.M.R.)

14 † Both authors contributed equally to this work

15 Received: 15 January 2020; Accepted: 10 February 2020; Published: date

16

17 **1. Materials and methods**

18 MSC bright-field imaging and phenotyping by flow cytometry

19 Bright-field images were taken with optical microscope Nikon Eclipse TS100 (Nikon, Tokyo,  
20 Japan) after 48 h before phenotyping by standard flow cytometry to determine MSC surface profile.  
21 Briefly, cells growth in different conditions (proliferative media, media with EV-depleted FBS and  
22 media without FBS) for 48 hours were resuspended and marked at concentration of  $1 \cdot 10^5$  cells/500  
23  $\mu$ L. For phenotypic analysis, cells were single labelled with fluorescein isothiocyanate (FITC) or  
24 phycoerythrin (PE) conjugated monoclonal antibodies: CD105-PE, CD90-FITC, CD73-PE, CD34-PE,  
25 HLA-DR-FITC (eBioscience, Thermo Fisher Scientific) and CD45-FITC (Life Technologies, Thermo  
26 Fisher Scientific). After labelling, cells were incubated for 10 minutes at 4 °C in darkness. Then, cells  
27 were washed with FC buffer (PBS with 20% human AB serum at pH 7.2) to remove antibodies not  
28 labelled to the cells. Finally, Guava® easyCyte™ System flow cytometer (Millipore, Burlington, MA,  
29 USA) was used to measure simultaneous forward (FSC) and side scatter (SSC), and to analyse the  
30 multiparametric fluorescent phenotypic marker signals. Ten thousand events were acquired for each  
31 analysis. Sample histogram elaboration was performed with Guava InCyte software to assess  
32 fluorescent distribution.

33 Western blot

34 EV samples and MSCs were lysed in ice-cold RIPA lysis buffer containing protease inhibitor  
35 (Roche Diagnostics) at the concentration recommended by the manufacturer. Non-lysate samples  
36 were prepared with non-reducing loading buffer (without  $\beta$ -mercaptoethanol) to detect tetraspanins  
37 presence. Cell lysate (cell lysate and cell lysate<sub>w/o</sub>) and EV lysate samples were prepared with  
38 reducing loading buffer (with  $\beta$ -mercaptoethanol) to detect cytochrome C and bovine serum  
39 albumin. All samples were loaded with the same amount of protein (10  $\mu$ g) in a 10 or 12%  
40 SDS-PAGE gels. Proteins were transferred onto nitrocellulose membrane by humid transference,  
41 blocked with 10% dry skimmed milk in TBS containing 10% Tween-20 and incubated overnight at  
42 4 °C with the following primary antibodies: anti-human CD9 monoclonal antibody (clone Ts9  
43 diluted 1:2,000), anti-human CD63 monoclonal antibody (clone TS63, diluted 1:2,000),

44 anti-cytochrome C monoclonal antibody (clone 37BA11, diluted 1:2,000, Abcam) and anti-Bovine  
 45 Serum Albumin monoclonal antibody (clone 2A3E6, diluted 1:1,000, Santa Cruz, Dallas, TX, USA).  
 46 Then, membranes were incubated for 1 h with HRP-coupled secondary antibody diluted 1:2,000. For  
 47 membrane exposure, membranes were incubated with Clarity Western ECL Substrate and  
 48 chemiluminescence were detected with C-DiGit® Blot scanner. Images were processed with Image  
 49 Studio Digits Software version 4.0.

50 In order to confirm the correct transferring of the proteins, before blocking, membranes were  
 51 then incubated with 0.2% (w/v) Ponceau S in 3% (v/v) acetic acid solution for 5 min. Then,  
 52 membranes were washed with deionized water. After taking images, membranes were finally washed  
 53 with TBS for 5 min.

54 **2. Results**

55 MSC characterization after conditioned media collection

56 Figure S1, S2, S3 and S4 show representative bright-field images of MSCs in culture after  
 57 collecting conditioned media under all conditions and cell surface profile plots obtained by flow  
 58 cytometry. Cells did not express CD34, CD45, and HLA-DR, while being positive for CD105, CD90,  
 59 and CD73, showing a typical profile of MSCs [46]. Moreover, similar % of viability for all the groups  
 60 was confirmed (94.8% for control, 95.3% for MSC conditioned without FBS and 95.8% for MSCs with  
 61 FBS).

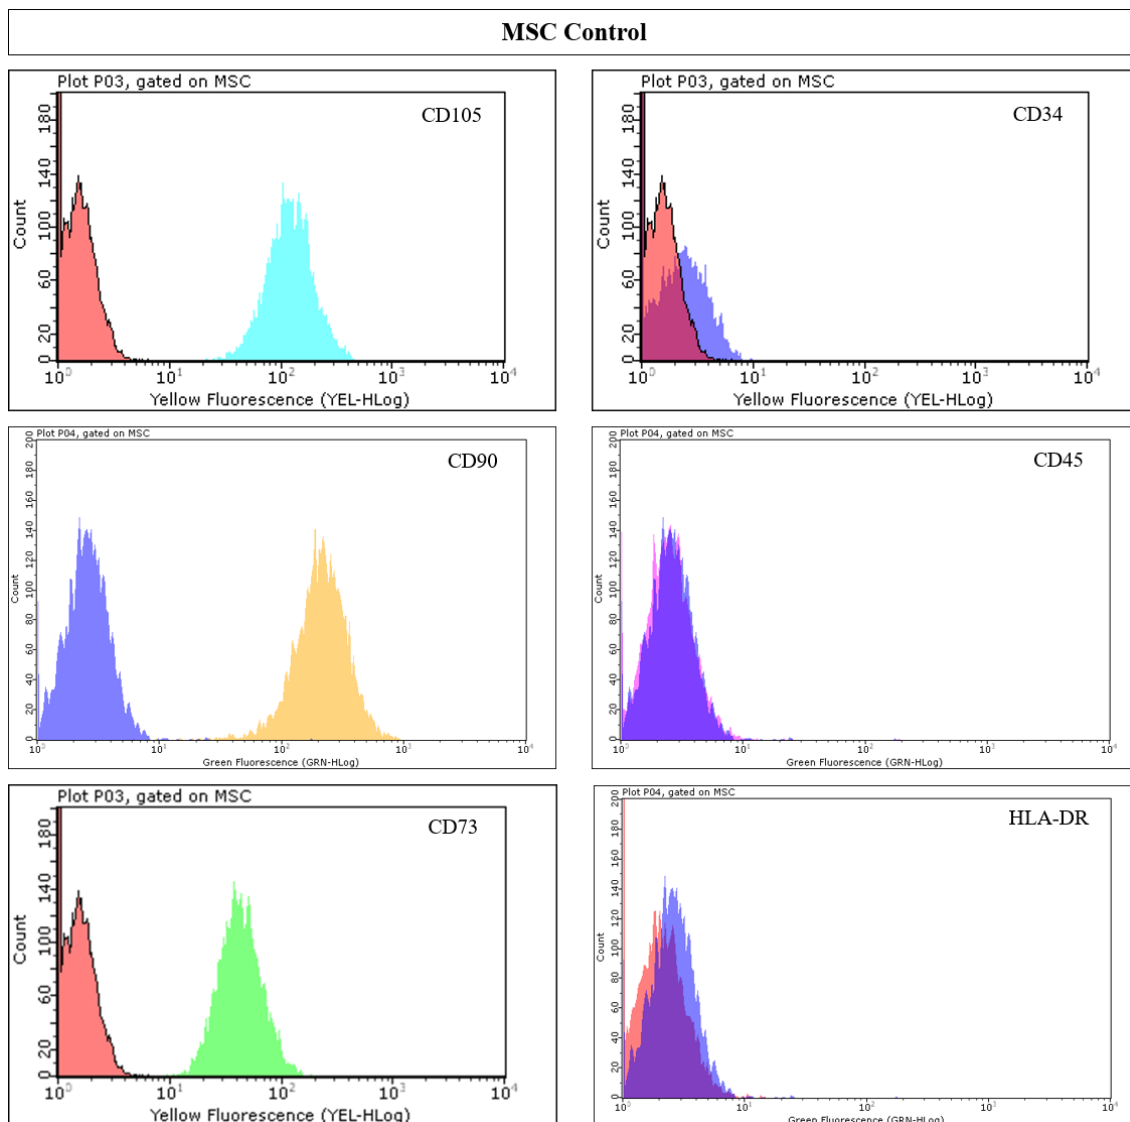

63 Figure S1: MSC profile by cytometry after conditioning for 48 hours in proliferative media with 20% FBS. A  
 64 typical profile of MSCs is shown after labelling cells with conjugated monoclonal antibodies: CD105-PE,  
 65 CD90-FITC, CD73-PE, CD34-PE, CD45-FITC and HLA-DR-FITC.

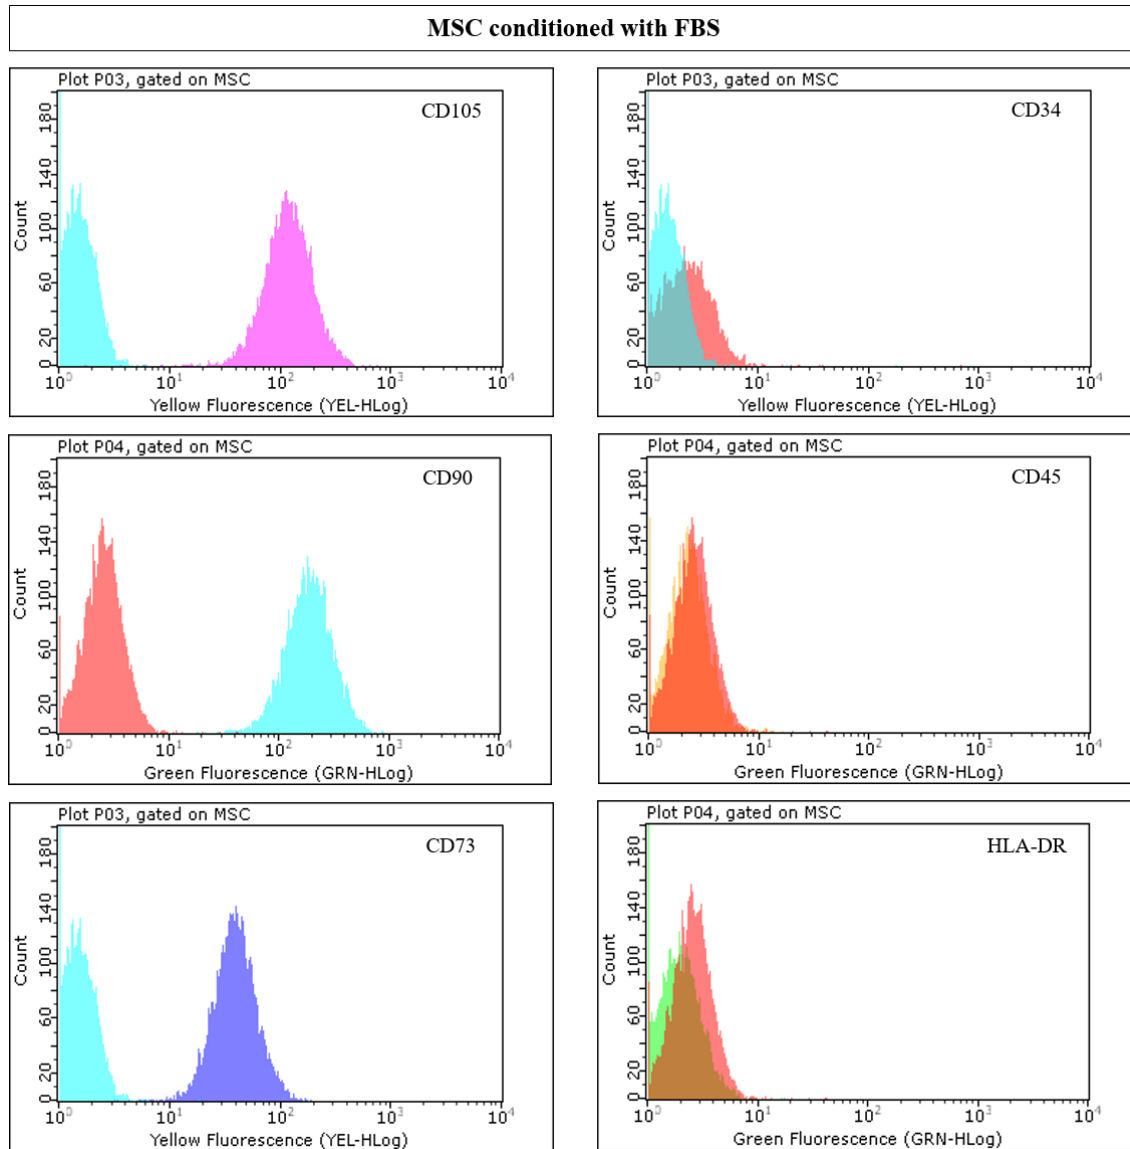

66  
 67 Figure S2: MSC profile by cytometry after conditioning for 48 hours in medium with 20% EV-depleted FBS. A  
 68 typical profile of MSCs is shown after labelling cells with conjugated monoclonal antibodies: CD105-PE,  
 69 CD90-FITC, CD73-PE, CD34-PE, CD45-FITC and HLA-DR-FITC.

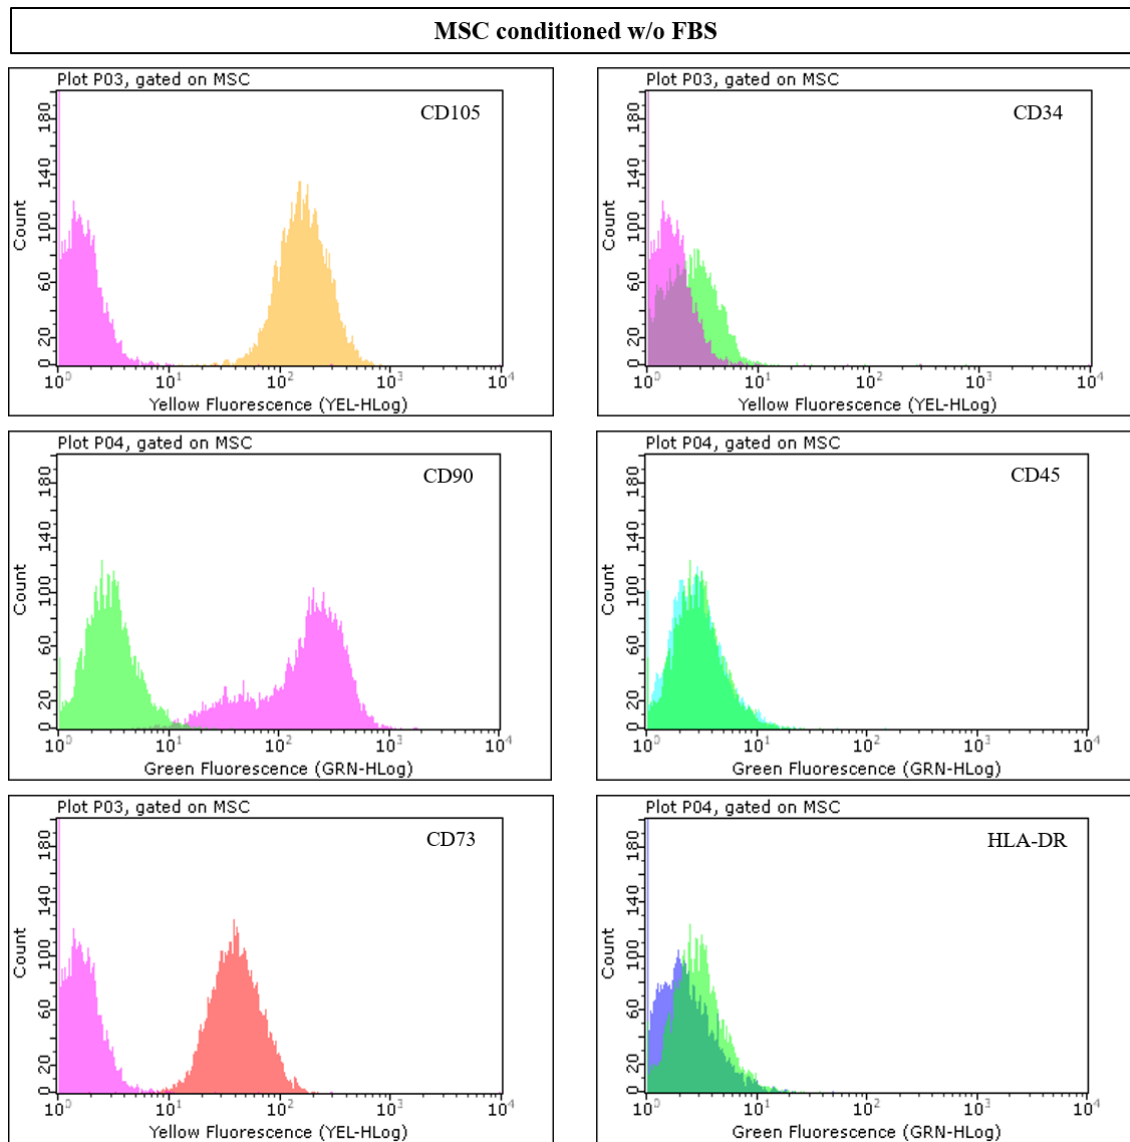

70

71 Figure S3: MSC profile by cytometry after conditioning for 48 hours in medium without FBS. A typical profile of  
 72 MSCs is shown after labelling cells with conjugated monoclonal antibodies: CD105-PE, CD90-FITC, CD73-PE,  
 73 CD34-PE, CD45-FITC and HLA-DR-FITC.

74

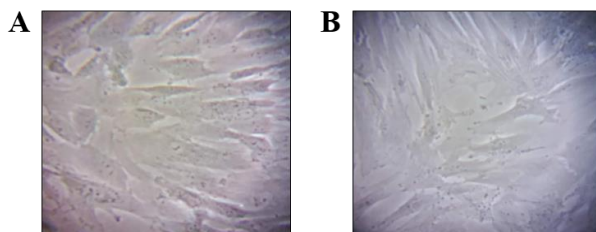

75

76 Figure S4: Representative bright-field images of MSCs in culture under all conditions. Bright-field image of  
 77 MSC cultured in medium with 20% EV-depleted FBS (A) or medium without FBS (B) for 48 h at 200x.

78

79

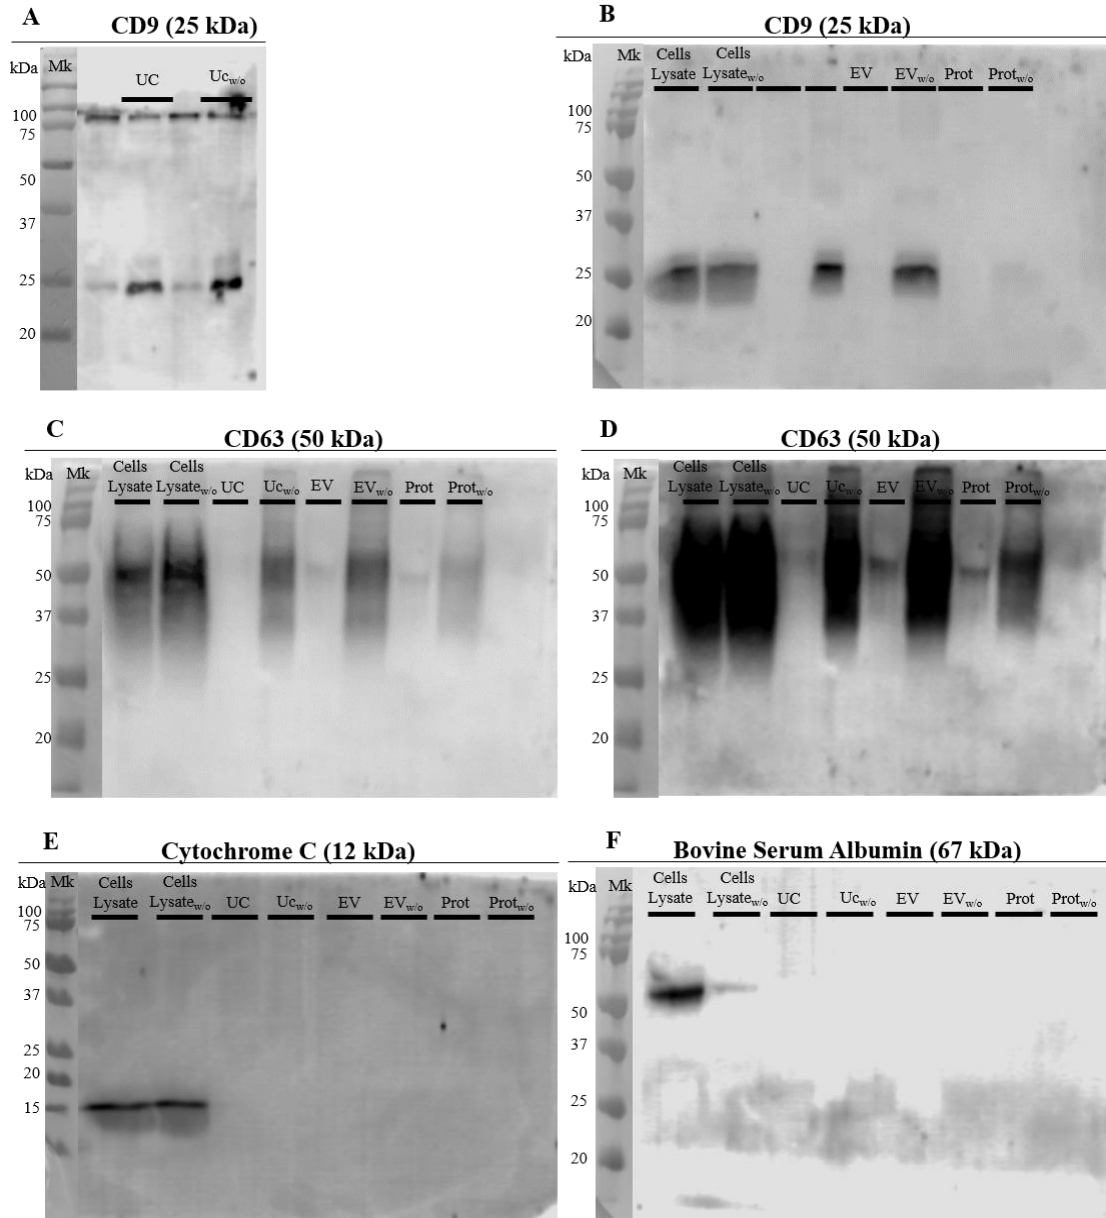

80  
81  
82  
83  
84  
85  
  
86  
  
87

Figure S5: EV markers on UC, UC<sub>w/o</sub>, EV, EV<sub>w/o</sub>, Prot and Prot<sub>w/o</sub> samples and cell lysates. (A) Presence of CD9 on UC and UC<sub>w/o</sub> samples. (B) Presence of CD9 in EV, EV<sub>w/o</sub>, Prot and Prot<sub>w/o</sub>. (C, D) Presence of CD63 in all samples at two different exposition times. (E) Absence of cytochrome C (a mitochondria marker) in all samples, except for cell lysate and cell lysate<sub>w/o</sub>. (F) Absence of bovine serum albumin (as marker of FBS contaminant) in all samples, except for cell lysate from cells growth in medium with FBS.

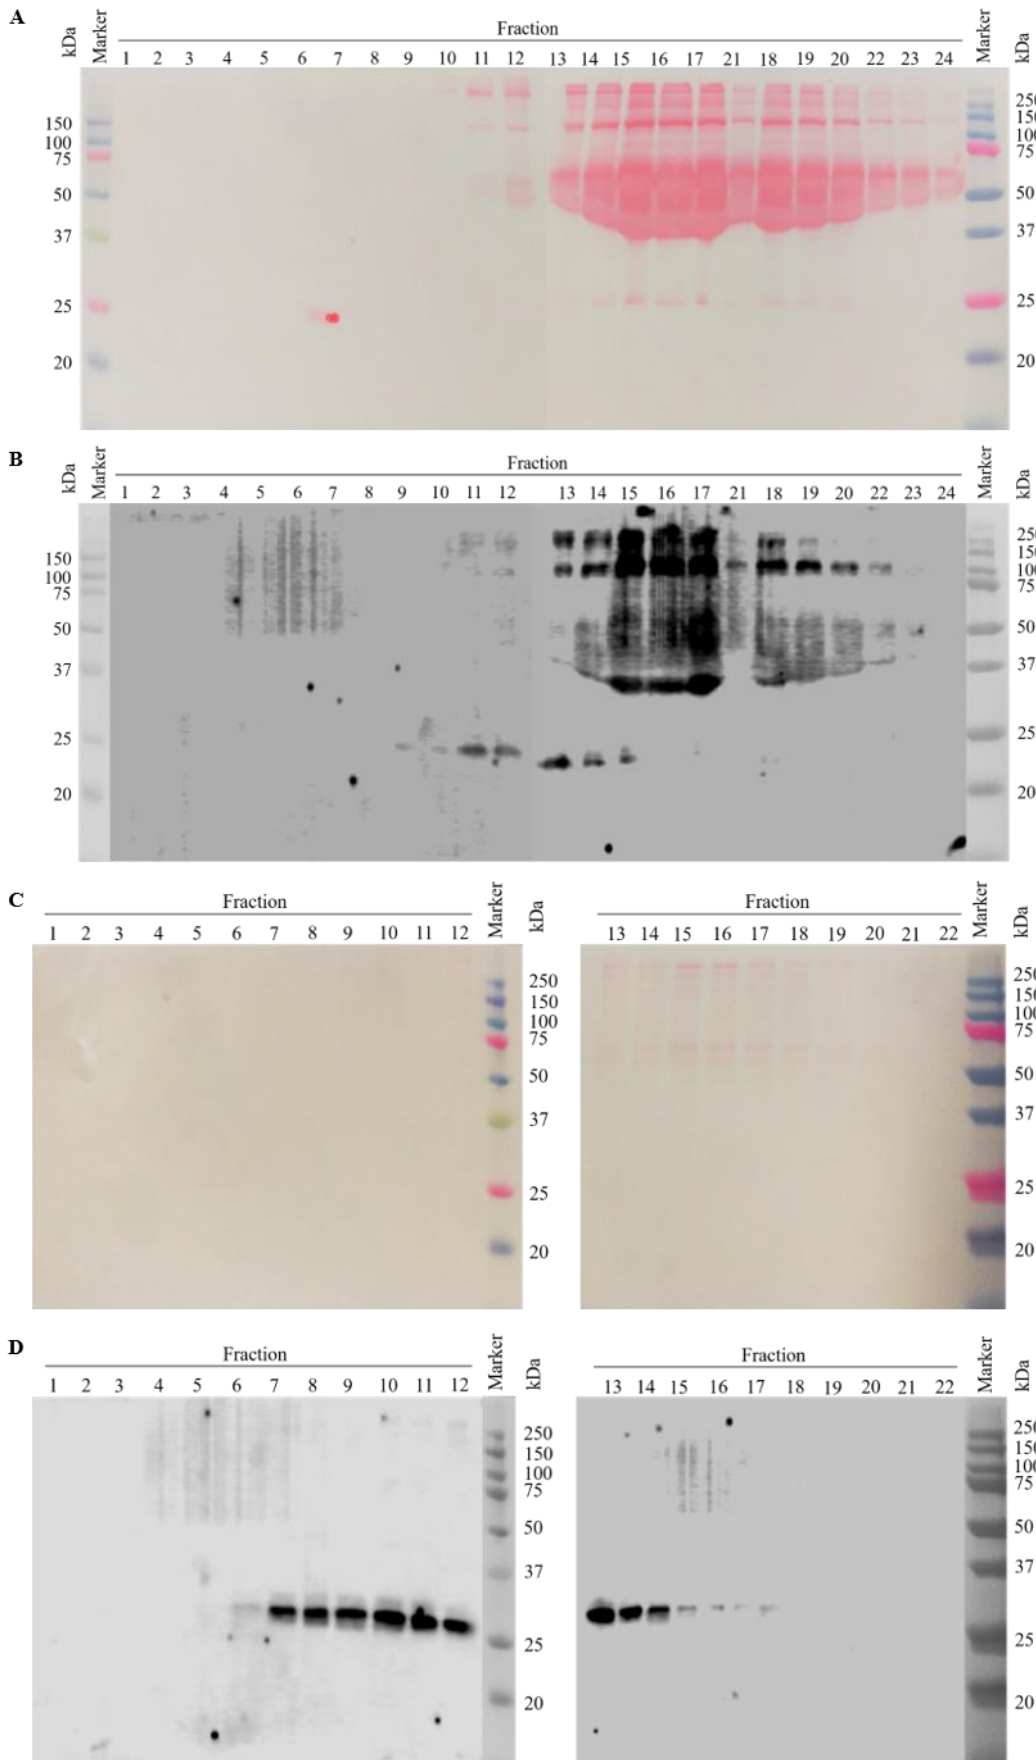

88

89  
90

Figure S6: Presence of proteins and EV marker in SEC fractions collected from UC and UC<sub>w/o</sub> samples. Presence of proteins in nitrocellulose membranes after staining with Ponceau S in fractions eluted from UC samples (A)

91 and from UC<sub>w/o</sub> samples (C). Presence of tetraspanin CD9 (24 kDa) in diferent fractions eluted from UC samples  
 92 (B) and UC<sub>w/o</sub> samples (D).

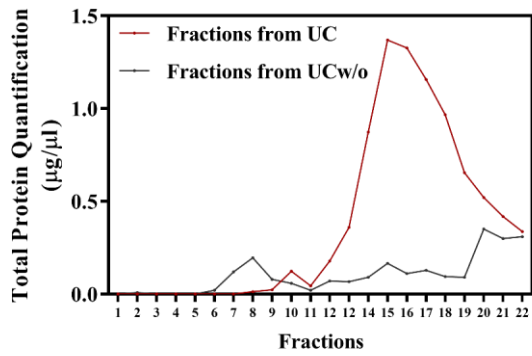

93

94 Figure S7: Total protein quantification of SEC fractions collected from UC and UC<sub>w/o</sub> samples. Protein  
 95 quantification measuring absorbances at  $\lambda = 280$  nm of the SEC fractions collected from UC and UC<sub>w/o</sub> samples.

96

97

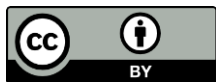

© 2020 by the authors. Submitted for possible open access publication under the terms and conditions of the Creative Commons Attribution (CC BY) license (<http://creativecommons.org/licenses/by/4.0/>).

98
